# Supplementary material
Source: PubMed Central journal article supplement (PMC4784854)
Supplement: berj029379.ww1_default.pdf [file berj029379.ww1_default.pdf]

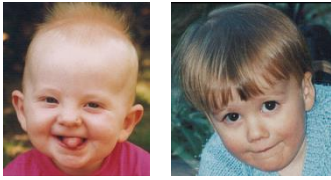

# AVERT Baby Count

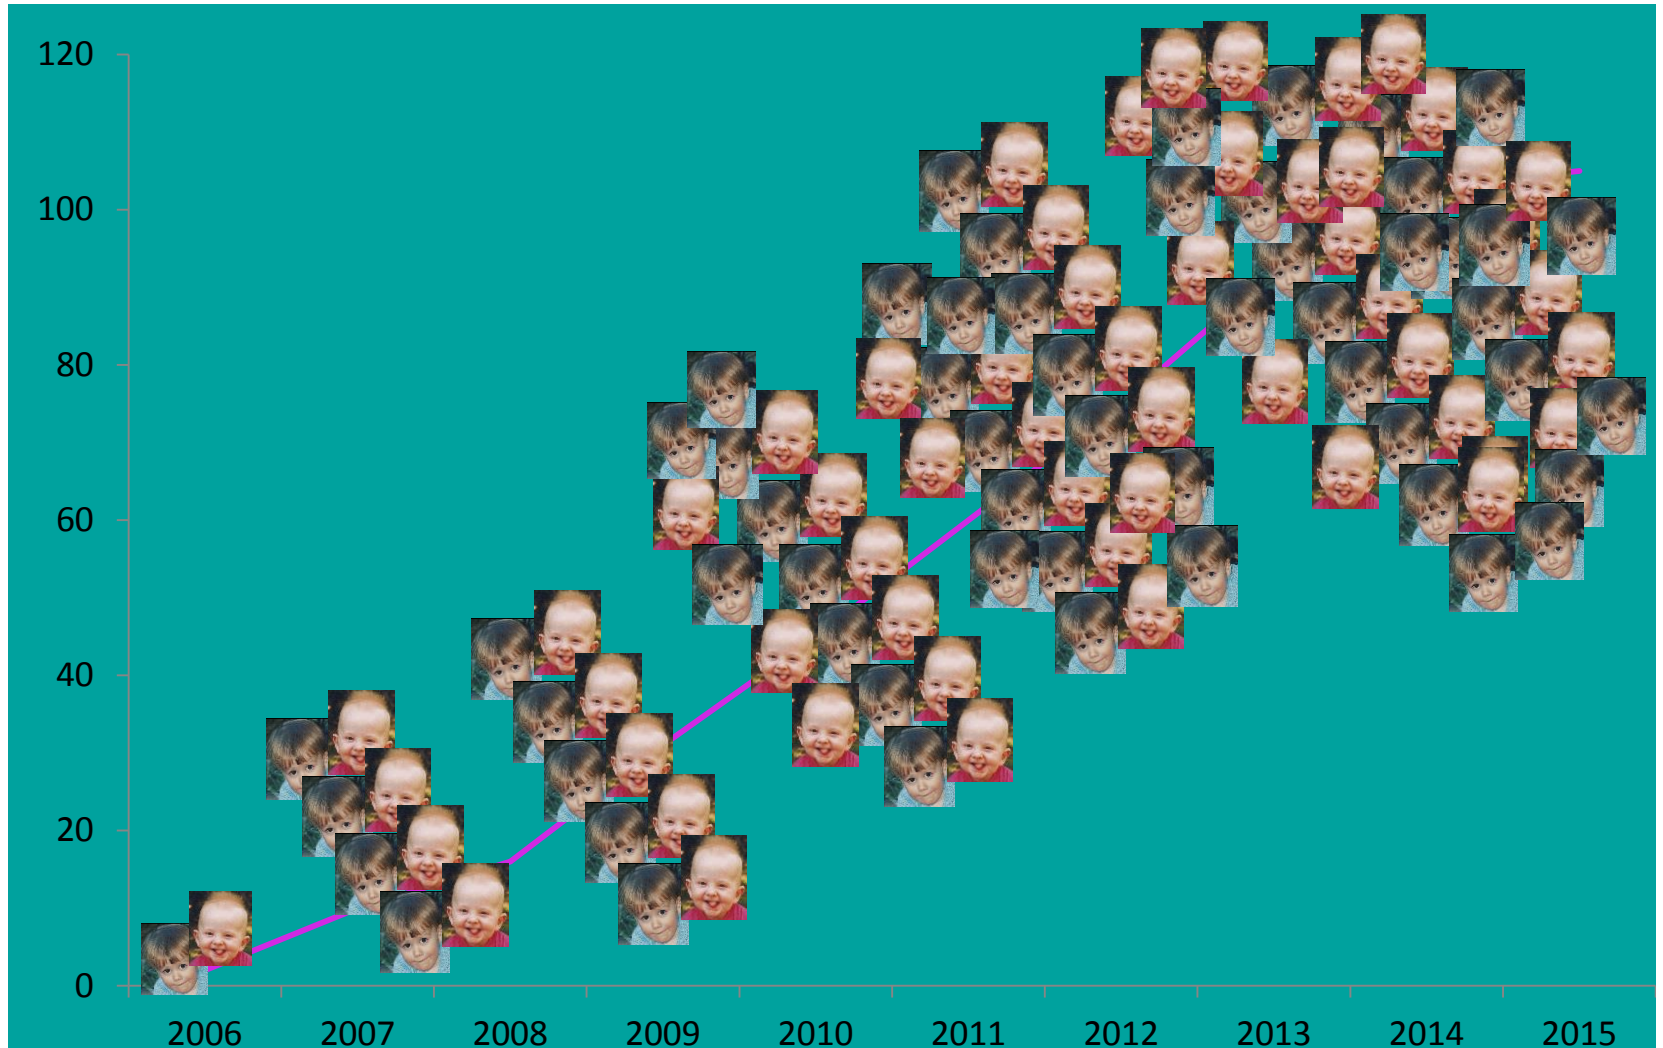

Supplementary Appendix Baby Count Graphic: Example of Powerpoint slide presented at meetings. Note: Images are of Chief Investigators' children who have grown up with the trial and consented to their use.
