# Supplementary material
Source: PubMed Central journal article supplement (PMC4784854)
Supplement: berj029379.ww2_default.pdf [file berj029379.ww2_default.pdf]

| Site | Closure after MI maternity leave | Sum of recruitment for two months prior to birth | Sum of recruitment for two months after birth | Total Births | Total recruitment |
|------|----------------------------------|--------------------------------------------------|-----------------------------------------------|--------------|-------------------|
| A    | Yes                              | 2                                                | 0                                             | 1            | 51-100            |
| B    | Yes                              | 1                                                | 0                                             | 6            | <20               |
| C    | Yes                              | 4                                                | 0                                             | 3            | 20-50             |
| D    | Yes                              | 0                                                | 0                                             | 2            | <20               |
| E    | Yes                              | 1                                                | 0                                             | 3            | <20               |
| F    | Yes                              | 6                                                | 0                                             | 3            | <20               |
| G    | No                               | 37                                               | 31                                            | 7            | >100              |
| H    | No                               | 7                                                | 6                                             | 4            | >100              |
| I    | No                               | 32                                               | 30                                            | 15           | 51-100            |
| J    | No                               | 11                                               | 0                                             | 5            | 20-50             |
| K    | No                               | 0                                                | 1                                             | 1            | 51-100            |
| L    | No                               | 4                                                | 4                                             | 3            | 51-100            |
| M    | No                               | 25                                               | 13                                            | 5            | >100              |
| N    | No                               | 0                                                | 0                                             | 1            | 20-50             |
| O    | No                               | 4                                                | 4                                             | 6            | 20-50             |
| P    | No                               | 6                                                | 1                                             | 2            | 51-100            |
| Q    | No                               | 9                                                | 3                                             | 3            | 20-50             |
| R    | No                               | 8                                                | 9                                             | 4            | >100              |
| S    | No                               | 16                                               | 11                                            | 7            | 20-50             |
| T    | No                               | 10                                               | 6                                             | 4            | 20-50             |
| U    | No                               | 7                                                | 5                                             | 5            | 20-50             |
| V    | No                               | 4                                                | 3                                             | 2            | 20-50             |
| W    | No                               | 6                                                | 3                                             | 4            | 20-50             |
| X    | No                               | 3                                                | 1                                             | 1            | 20-50             |
| Y    | No                               | 5                                                | 2                                             | 2            | 20-50             |
| Z    | No                               | 7                                                | 5                                             | 3            | 51-100            |
| AA   | No                               | 8                                                | 7                                             | 2            | 51-100            |
| BB   | No                               | 4                                                | 0                                             | 1            | 20-50             |

**Web appendix 2:** Summary of recruitment rate for two months pre and post birth per site for sites that closed after maternity leave or recruited more than 20 patients. In most cases recruitment rate dropped. However we do acknowledge that there may be other reasons for variation in recruitment pre and post birth.

To de-identify sites and give context for recruitment rates, we provide recruitment grouped into <20, 20-50, 51-100 and >100 patients.
