# Supplementary material
Source: PubMed Central journal article supplement (PMC4784854)
Supplement: berj029379.ww3_default.pdf [file berj029379.ww3_default.pdf]

**Web appendix 3: Estimated additional costs due to AVERT team births**

| Cost items                                                 | Units      | Number of birth episodes <sup>a</sup> | Number of sites affected | Units per Site <sup>b</sup> | Total additional time | Unit cost (AUD) <sup>c</sup> | Total cost (AUD)  |
|------------------------------------------------------------|------------|---------------------------------------|--------------------------|-----------------------------|-----------------------|------------------------------|-------------------|
| <b>Recruitment time</b>                                    |            |                                       |                          |                             |                       |                              |                   |
| - Additional recruitment time                              | months     | 116                                   |                          | 2                           | 232                   | 2616.6 <sup>d</sup>          | 607,051           |
| - Additional training time                                 | hours      | 116                                   |                          | 2.5                         | 290                   | 60                           | 17,400            |
| <b>Site closures</b>                                       |            |                                       |                          |                             |                       |                              |                   |
| - Administration time associated with closure of sites     | hours      |                                       | 6                        | 3                           | 18                    | 45                           | 810               |
| - Project management time associated with closure of sites | hours      |                                       | 6                        | 7                           | 42                    | 60                           | 2,520             |
| <b>Site openings</b>                                       |            |                                       |                          |                             |                       |                              |                   |
| - Administration time associated with opening of new sites | hours      |                                       | 6                        | 12                          | 72                    | 45                           | 3,240             |
| - Project management time                                  | hours      |                                       | 6                        | 32                          | 192                   | 60                           | 11,520            |
| - Additional administration time associated with training  | hours      |                                       | 6                        | 16                          | 96                    | 45                           | 4,320             |
| - Additional onsite staff time in training new staff       | hours      |                                       | 6                        | 30                          | 180                   | 36                           | 6,480             |
| - Travel and face-face visits                              | visit      |                                       | 6                        |                             |                       | 500                          | 3,000             |
| - Ethics submissions                                       | submission |                                       | 6                        |                             |                       | 1,500                        | 9,000             |
| <b>Total costs</b>                                         |            |                                       |                          |                             |                       |                              | <b>AUD665,341</b> |
| <b>Average costs per birth episode</b>                     |            |                                       |                          |                             |                       |                              | <b>AUD5,736</b>   |

<sup>a</sup> Takes into account multiple births

<sup>b</sup> Number of units sourced from AVERT Central (Australia) records

<sup>c</sup> Unit costs estimated from AVERT records

<sup>d</sup> Obtained by dividing the total project cost by the total number of observed recruitment months (2376)
