# Supplementary material
Source: PubMed Central journal article supplement (PMC4784854)
Supplement: berj029379.ww4_default.pdf [file berj029379.ww4_default.pdf]

## **Web appendix 4: AVERT committees, advisors and coordinating centres**

### **Management Committee**

Julie Bernhardt (Chair), Leonid Churilov, Janice Collier, Helen Dewey, Geoffrey Donnan, Fiona Ellery, Peter Langhorne, Richard Lindley, Marjory Moodie, Brooke Parsons (Consumer Representative), Amanda Thrift.

### **Trial Steering Committee**

Geoffrey Donnan (Co-Chair), Helen Dewey (Co-Chair), Julie Bernhardt, Peter Langhorne, Marjory Moodie, Brooke Parsons (Consumer Representative) and Main Investigators (MIs) from all participating hospitals.

### **International Advisors**

Bent Indredavik, Torunn Askim.

### **Data Monitoring Committee**

Phillip Bath (University of Nottingham, Nottingham, United Kingdom, Chair), Christopher Bladin (Box Hill Hospital, Melbourne, Australia), Christopher Reid (Monash University, Melbourne, Australia), Stephen Read (Royal Brisbane and Women's Hospital, Melbourne, Australia), Cathy Said (Austin Health, Melbourne, Australia).

### **Outcomes Committee**

Sandy Middleton (Australian Catholic University, Sydney, Australia, Chair), Judith Frayne (Alfred Hospital, Melbourne, Australia), Velandai Srikanth (Monash Health, Melbourne, Australia).

### **Country Leaders and Grant Holders**

Australia: Julie Bernhardt, (NHMRC: Helen Dewey, Julie Bernhardt, Geoffrey Donnan, Amanda Thrift, Robert Carter, Richard Lindley) (NHMRC: Julie Bernhardt, Geoff Donnan, Richard Lindley, Amanda Thrift, Peter Langhorne, Marjory Moodie, Helen Dewey, Leonid Churilov).

United Kingdom: Peter Langhorne, (CHSS: Peter Langhorne, Olivia Wu, Julie Bernhardt, Matthew Walters Claire Ritchie, Lorraine Smith), (TSA: Peter Langhorne, Olivia Wu, Anne Ashburn, Helen Rodgers, Julie Bernhardt), (HTA: Peter Langhorne, Anne Ashburn, Julie Bernhardt, Helen Rogers, Olivia Wu).

Northern Ireland: Sheila Lennon, (NICHS: Sheila Lennon, Michael Power, Julie Bernhardt).

Singapore: Shahul Hameed, (Singhealth: Shahul Hameed, Ratnagopal Pavanni, Peter Lim, Julie Bernhardt, Dawn Tan).

### **Statistics and Data Management**

Leonid Churilov, Tim Brewer, Janice Collier, Nick Haritos, Edwin Leong, Cecilia Li, Caesar NayWin, Marcus Nicol, Liudmyla Olenka, Li Chun Quang.

### **Health Economics**

Marjory Moodie, Robert Carter, Silvia Hope, Lauren Sheppard, Kiusiang Tay- Teo, Olivia Wu.

### **Cognition**

Toby Cumming, Thomas Linden.

## **Trial Coordinating Centres**

### **The Florey Institute of Neuroscience and Mental Health, Melbourne, Australia.**

Karen Borschmann, Jan Chamberlain, Janice Collier, Toby Cumming, Fiona Ellery, Teresa Occhiodoro, Helen Palfreeman, Tara Purvis, Bernadette Sirgo, Nick Tiliacos, John Van Holsteyn, Henry Zhao.

**University of Glasgow, Glasgow, United Kingdom.** Beverly Armstrong, Louise Craig, Fiona Graham, Lynn Legg, Rosemary Morrison, Heather Moorhead, Lorraine O'Donohue, Susan Rogers, Myra Smith.

**University of Central Lancashire, Preston, United Kingdom.** Denise Forshaw, Jane Fitzgerald.

## **List of AVERT collaborators, countries and recruitment at each participating hospital**

Figures in parentheses are the number of patients recruited by the centre. Main Investigators are listed first for each site (MI). Some investigators worked across multiple sites, however, they are listed for one site only.

### **Australia**

**Austin Hospital (253):** E Hibbert, R Melling, S Petrolo, T Purvis, H Williamson (MIs), P Adams, L Augoustakis, S Batcheler, S Berney, V Cobani, B Cohen, H Dewey, S Gangi, N Giofre, C Gordon, L Hegarty, M Hindson, F Horvath, S Kalinowski, A Kleine, S Kramer, J Lawrence, S Lindquist, N Logan, A Macdonell, J Matlioski, N McDonough, S McLennan, M McNamee, L Miller, C Nall, E Nelson, K Ng, Z Nicholas, C Nunn, K Owen, E Plant, L Proud, D Quah, K Rodway, S Sertori, V Sheldon, L Sherry, S Speare, K Stansfeld, N Studden, Z Teoh, L Twist, G Velupillai, L Walker, K Wall, A Warwick, R Wharrie, J Wilson, H Worboys, D Young. **Royal Perth Hospital (149):** J Ancliffe (MI), M Bryant, B Doran, M Field, P Fogliani, A Haber, G Hankey, D Hendrie, V Jackaman, A Jacobsen, S Jose, R Lim, R Louis, S Nanthakumar, S Pain, A Power, B Rappeport, J Reynolds, L Smith, S Tombe, A Wesseldine, T West. **The Royal Melbourne Hospital (95):** K Clarke, H Maccanti, L Marr, S Plumb, J Quiney, L Werner (MIs), E Abeykoon, W Apirutvorrachod, L Attard, S Behanan, D Brown, K Buchanan, D Butler, M Camac, S Davis, D Diocera, N Gan, C Gendre, J Germaine, P Hand, L Maurenbrecher, J McCulloch, S Mcritchie, M Ong, R Pachett, L Pesavento, H Power, R Reilly, M Sawers, G Silva, C Stevens, L Taylor, T Timms, M Ugalde, A Vardy, J Wallace, S Walsh, E Whatley, E Winter. **Frankston Hospital (90):** M Baxter, M Davis, L Sundararajan (MIs), E Butler, K Caspers, E Coulter, S Shaw, F Kent, H Lack, F Leavold, J Lord, J Martin-Francisco, R Mohanraj, R Nelson, T O'Neill, R Otto, J Parker, V Rees, B Stevens. **Westmead Hospital (84):** R Chen (MI), RI Lindley, J Bindra, R Dongre, N Downey, M Ferris, L Gibson, R Gonzalez, M Kinniburgh, M Lazaridou, D McCormack, R Singh, A Stepney, Y Tria. **Geelong Hospital (74):** K Bainbridge, B Killey, R Sheedy (MIs), O Aitchison, L Bray, K Clatworthy, S Coghill, M Collins, L Cornwall, J Dow, P Gates, S Gillett, N Johnson, S Joseph, K Kopelke, R Lam, R Levy, N Lloyd, S Logan, G McPherson, M Newth, C Parsons, K Powles, M Rebis, T Samakowidic, L Sanders, S Savickas, J Shrimpton, H Smith, L Smith, J Spehr, J Summers, G Taylor, M Thackeray, B Wilkinson. **The Alfred (42)** K Richardson (MI), J Frayne, E Barber, L Bode, A Brakey, K Chand, P Christin, G Crook, D Delrosario-Kelly, R Descallar, A Deutsch, S Easo, M Farquhar, P Fergus, J Ford, E Hamson, M Hlaing, E Hope, J Lacivita, J Laurenson, K Lock, N Ly, K McKay, C Mill, K Moloney, L Price, T Terry, A Tyers, S Willems, R Woolstencroft. **Flinders Medical Centre (40):** N Crawshaw, J Luker, C Wood, S Choat (MIs), C Archer, D Benham, M Billinger, M Bronca, S Curchin, C Dickie, M Dixon, D Douglass,

M Enomoto, K Ernst, L Fries, S George, E Green, L Hamilton, Z Harris, T Heard, G Hunt, N Jamieson, M Mackenzie, H McKearney, B Oermann, C O'Reilly, T Pearson, N Reid, L Rodda, D Scutcheon, C Simons, R Smith, L Tait, J Troake, D Usher. **Western Hospital (37)**: L Mackey, T Wijeratne (MIs), C Abela, S Ashoka, C Chen, T Cheng, V Chong, S Cooke, A Fok, L Galang, C Grant, S Karageorge, K Kat, L Keo, B Lee, A Luscombe, J Mackay, M Minett, J Mizen, P Nim, N Nunlist, V Patel, M Pathirage, A Paton, M Pombuena, N Rathnayake, L Rhodes, M Sequeira, S Smart, S Somaratne, N Sta Maria, L Talbot, R Tecele. **Epworth Richmond (23)**: M Shannon, R Gerraty (MIs), S Allen, R Boyle, N Fatchen, N Hendley, A Hyde, M Inal, P Kalubowilage, M Laverde, K Lawless, A McFadyen, K Peters, C Pugh, C Qin, J Robertson, S Smee, R Tomlinson, V Wang, F Williams, D Woolley, R Yawieriiin. **St George Hospital (23)**: N Austin, S Pomfret, M Tinsley (MIs), L Allport, C Ang, L Armitage, E Blundell, A Courtney, M Dela Costa, T Devi Thapa, P Diwakar, M Dulleh, J Francis, P Cic, G Gellie, C Gill, D James, S Lee, T Mai, K Majcher, C Mawson, G Newton, N Qiu, E Ragonton, L Roberts, H Saitamis, L Stanwell, L Ting, P Xu, L Yin. **Albury Hospital (23)**: V Crosby (MI), K Broadhead, J Church, R Collins, K Everitt, M Fisher, K Hochmuth, N Jones, A Lieschke, E McCarthy, C McGlone, D Morey, D Neilson, S Spry, M Vile. **Nambour General Hospital (20)**: R Grimley, D Rowley (MIs), I Rosbergen, E Ahern, L Anderson, J Boreham, R Devin, R Doolan, M Dyke, L Griffiths, K Guest, D Hecita, N Kendal, J Koltermann, M Lacy, S Lebeter, D Lloyd, M Matthews, C McAuley, A Pollock, M Pyke, T Rogers, S Street, G Styles, A Tampiyappa, J Trinder, T Verral, K Walker, C White. **Sir Charles Gairdner Hospital (15)**: T Beckwith, L Cormack (MIs), J Arriagada, C Babenschneider, D Blacker, S Bennett, S Connor, J Cowmeadow, N Daniel, G Edmonds, M Faulkner, M Garcia-Vega, K Kruger, B Martial, P McGinley, H Mountford, V Riley, N Smith, F Stepan, S Tilley, S Whisson. **Warrnambool Base Hospital (15)**: P Groot (MI), J Bailey, K Ballinger, C Bell, B Camilleri, C Charnley, D Crabbe, S Crossland, N Edirimanna, C Fitzgerald, C Gibbins, J Gibbs, K Hirst, A Kennedy, E Klose, K McDowall, S Miller, R Morgan, A Noonan, M North, M Oliver, K Richards, T Russell, N Scott, A Shlanski, A Traynor. **West Gippsland Hospital (12)**: S Smith (MI), R Adams, C Banks, K Burke, S Hewat, B McKenna, M McKimmie, L Polmear, M Traumanis, S Whiteman. **St Vincent's Hospital (12)**: V Bramah, R Errey, M Halpin, V Molan, D Wheelwright, N Wilson, W Zhang (MIs), M Bakshi, S Bracher, M Bryant, W Byrnes, T Denton, N DeVries, P Fay, P Galbraith, T Gallaher, O Haidar, K Holgate, K Hozack, N Jackson, S Kipps, S Lerner, R Markus, R Merheb, C Naismith, G Nolan, R Odelli, K Page, P Sangvatanakul, T Simpson, P van Vliet, K Walch, S Walker, T Yasue. **Wyong Public Hospital (11)**: G Auld (MI), R Baker, K Cousins, M Fairbrother, K Hutchinson, M Maclean, E Maher, D Mills, S Ohlback, J Sturm, M Tooth, J Watkins. **The Wesley Hospital (9)**: J Cramb (MI), P Atkinson, J Conrad, D Fichera, S Follent, C Gilbert, M Herzig, S Kohler, S McCracken, L Nunan, S Roberts, J Shelley, S Varendorff, A Wills. **Calvary Mater Newcastle Hospital (8)**: A Moore, A Robertson (MIs), J Britton, A Burgess, T Coates, J Croft, E Greening, J Holland, P O'Brien, R Strong. **Wodonga Hospital (8)**: L Tighe (MI), S Bilston, J Black, K De Rivera, I Dwyer, S Gissane, K Heckenberg, S Jackson, A Maclagan, L O'Hare, H Patel, J Pearce, C Scanlan, K Seymour, M Symington, A Tyers, A Waite, K Wiesner. **Belmont Hospital (5)**: O Katalinic, M Spear (MIs), P Brown, E Difuntorum, S Gilbert, J Henderson, D James, H Janssen, E Lane, S Lowndes, D Smith, S Thompson, D Weaver, S Weston, S Wright. **Wollongong Hospital (4)**: S Cox, C Tse (MIs), J Adrian, M Doughty, J Kok, R McGrath, T Morris, A Pickup, E Ray, R Richardson, M Sims, C Thompson, K Trinh, N Walton, F Whittaker. **Gosford Hospital (2)**: P Andersen (MI), J Burrows, M Dawson, D Griffiths, G Harris, P Kavalieros, B O'Brien, K Roberts, J Watkins, C Whyatt.

#### **New Zealand**

**Auckland City Hospital (189)**: A McRae, G Wavish (MIs), F Anos, J Armstrong, E Au, A Barber, C Bates, M Bertulfo, A Boggs, F Burgess, K Cassels-Brown, M Chiu, S Dass, N Duff, J Farrell, W Foster, D Fuertez, C Gadhvi, S George, A Green, L Harvey-Fitzgerald, L Hau, L Hayward,

D Holman, K Huggins, M Jacobs, A John, H Kaur, T Lagerstedt, J Lee, R Llenes, L Lyons, S Magandi, M Martin, S Mathew, T Mathew, D McKellar, E Moss, KL Nand, K Nicol, F Peterson, A Prasad, K Quick, E Revell, S Roy, J Ryan, N Samadi, B Scrivener, J Slow, S Tharakan, J Torrens, E van Bysterveldt, C Villaluz, S Yang.

### **Malaysia**

**UKM Medical Centre (123):** Katijjahbe MA (MI), Ai Sing G, Azlina A, Azmi MI, Efri MH, Fadilah AZ, Fathuddeen H, Haryani H, H Hussien, Izuani M, ZC Man, Man Ying C, Mashitoh KM, Noor Azah A, Norlinah MI, Norliza I, Ravinder KB, Rohaizah R, Rosnita K, Rozita A, Safwan J, R Sahathevan, Shahrul I, Sharifah SM, Tan HJ, Wan Nafisah WY, YL Yee, Zaharah MA, Zunaidah AS.

### **Singapore**

**Singapore General Hospital (128):** D Tan, MT Ahmad, S Hameed (MIs), MFB Bakari, J Britto, JJ Chen, S Choo, M Faizal, FK Fong, S Hong, J Ja'afar, Z Ke, G Koh, CK Lee, YF Lee, P Lim, GM Lim, SH Ninhadi, G Ong, T Pei Pei, V Penero, N Rahim, P Ratnagopal, K Saleh, HC Seow, E Sim, CK Tan, PY Tay, I Teo, S Thilarajah, PHJ Wong, WP Wong, S Yeap.

### **United Kingdom**

**Forth Valley Royal Hospital (65):** M Macleod (MI), A Anderson, K Armstrong, K Baird, D Balfour, M Boyd, J Cameron, C Carswell, C Clanachan, L Cuthill, I Devoy, S Forsyth, J Gavin, M Hughes, E Marr, S McAuley, E McCagherty, K McCallum, N McDonald, C McGhee, TA McIntyre, L Noonan, A Smart, R Walshe. **Yeovil District Hospital (61):** D Neal (MI), J Allison, G Ball, S Board, H Brunt, C Buckley, C Carroll, D Hayward, T Hutchinson, E Jones, E Keeling, E Marsh, N Mead, H Smith, C Vickers, B Williams-Yesson, D Wood. **York Hospital (54):** J Coyle, M Keeling (MIs), L Ackroyd, C Brown, K Donnan, N Dyer, H Green, G Kilbride, C Nicholson, M Porteous. **Royal Victoria Infirmary (35):** S Louw (MI), A Annamalai, A Barkat, S Crawford, M Fawcett, D Harvey, V Hogg, A Hughes, J Kemp, J Morrison, K Storey, T Thompson. **Aberdeen Royal Infirmary (33):** J Furnace, MJ Macleod (MIs), J Bell, K Bennett, M Bruce, R Clarke, H Cowie, H Gow, J Irvine, A Joyson, S MacDonald, A Macvicar, N Murphy, J Robertson. **Royal Bournemouth Hospital (32):** C Gordon, J Kwan, L Redpath, K Saunders (MIs), J Bell, R Burrow, C Clarke, C Dickson, G Hann, M Heath, S Heath, A Hewett, R Humphrey, B Longland, A Orpen, C Ovington, J Page, E Rogers, K Toombs. **Imperial College Healthcare, St Mary's Hospital (29):** R Howes, A Lacey, P Meakin (MIs), D Ames, S Banerjee, E Beranova, S Berry, MJ Burke, VCassama, K Collins, J Crow, A Dunne, C Gomez, A Hawkins, K Hellier, SA Howard, A Kar, E Lambert, H Lee, C Mandri, J Moye, E Murtagh, J Pushpa-Rajah, J Richardson, TSachs, J Stilwell, V Tilley, P Wilding, N Wilson. **Wishaw General Hospital (28):** E Feely, S Kirk (MIs), P Cassidy, A Chalmers, C Duguid, N Hughes, J Hutton, K Lapsley, J Lee, A Murray, L Weir, M Whitelaw. **Monklands Hospital (26):** M Barber, D Esson (MIs), H Armit, C Devlin, R Duncan, C Forman, K Frame, L Hogg, P McLeod, R McWhinney, J Porter, M Purves, L Snowball. **Ulster Hospital (25):** B Wroath (MI), L Ferson, M Gibson, S Gillespie, N Ignatius, T Kane, J Kwant, M Matthews, C McCallion, C McConville, M McDowell, C McNally, L Moore, P Murphy, A Nesbitt, J Newell, M Power, E Reid, K Robinson. **Royal Devon and Exeter Hospital (23):** C Charnley, M James (MIs), S Bacon, N Booth, A Bowring, L Boxall, J Burt, J Cageao, N Green, K Gupwell, S Keenan, H Kingwell, M Kryszkowska, J Mortimore, B Peace, C Roughan. **Queen Elizabeth The Queen Mother Hospital (21):** G Gunathilagan, J Sampson, G Thomas (MIs), T Allen, G Dane, K Harris, S Hart, SA Jones, M Reader. **Antrim Area Hospital (18):** P Browne, C McGoldrick, D Mullan (MIs), P Adair, J Armstrong, E Beggs, I Bell, C Edwards, L Gilligan, C Kelly, M Kennedy, J Kurian, L Leal, A McAtamney, E McKay, E Rogan, M Smyth, E Wiseman, J Vahidassr. **Wansbeck General Hospital (18):** C Price, V Riddell (MIs), E Bendix, K Craig,

R Davison, A Harrison, A Smith. **Blackpool Hospital (17):** V Green (MI), K Ashton, W Barkhuizen, A Daniel, C Dickinson, H Durdu, D Eastwood, H Goddard, R Hodkin, J Howard, C Jeffs, S Joyce, C Kelly, G Kerr, J Lanes, B Magnall, M McMahon, M Moody, S Patton, R Taylor, A Watson. **North Tyneside General Hospital (17):** K Mitchelson, L Mokoena (MIs), L Aird, R Lakey, J Murdy, K Nelson, G Storey. **Belfast City Hospital (15):** R McGeown, S Tauro (MIs), R Brady, D Holland, M Kinnaird, L Maltman, D Martin, K McCord, S McKenna, C Morgan, C Shannon, A Steele, I Wiggam. **Harrogate District Hospital (15):** S Appleby, S Brotheridge, M Prescott (MIs), P Bagot, D Baston, C Bennett, J Featherstone, C Hare, A McCluskey, S Wade, R Worton. **St Mary's Hospital, Isle of Wight (13):** E Hakim, J Herman, T Norman (MIs), L Beale, E Buckley, K Byrne, M Gasior, B Robles, C Smallwood, S Stevens, M Thomas, V Williams. **Nevill Hall Hospital (12):** K Buck (MI), S Armstrong, V Brice, A Edwards, S Gething, A Griffiths, T Hills, D Howells, S Langdon, S Moseley, G Powell, G Reynolds, B Richard, E Scott, R White, J Zebedee. **Western Infirmary (10):** M Walters (MI), J Alexander, L Brand, E Colquhoun, A Hill, D Macartney, H MacDonald, B Manak, H Morgan, C Ritchie. **South Tyneside District Hospital (8):** H Hunter (MI), T Blair, M Duffy, J Graham, J Scott, T Vu, P Yorston. **Calderdale Royal Hospital (7):** A Nair (MI), I Shakir, C Button, M Friend, J Greig, B Hairsine, S Wade, S Williamson. **St George's Hospital (7):** G Cloud (MI), T Adedoyin, N Dayal, S Gawned, R Ghatala, N Jeyaraj, L Kerin, L Montague, C Orefo, J O'Reilly, J Styles, S Trippier, C Watchurst, F Watson. **North Devon District Hospital (6):** J Hunt, R Latif (MIs), C Barrett, J Cox, F Hammonds, K Quick, K Robinson, A Skinner, C Vernon. **Royal Infirmary of Edinburgh (6):** S Burgess, T Elder-Gracie (MIs), C Browne, W Cameron, V Coleman, C Fulgencio, L Gibson, P Halliday, D Heaney, L Main, K McGavin, G Mead, F Proudfoot, A Redpath, C Rodger, S Scott. **Hexham General Hospital (5):** K. Robinson. **University Hospital Crosshouse (3):** K Mason (MI), L Baxter, A Bryce, M Halkett, J Halliday, A McAllister, M McGuinness, M Munro, A Robb, A Thompson, B Tougher, J Weadon, J Young. **Daisy Hill Hospital (1):** C Douglas (MI), M McParland, S Boyle, B Byrne, L Comiskey, J Gilpin, S Gilpin, A Harris, S Harshaw, J Haughey, F McArdle, L McConnell, E McEaney, M Millar, M Murphy, J Tilley.
